# Supplementary material for: Glutathione Plays a Positive Role in the Proliferation of Pinus koraiensis Embryogenic Cells
Source: MDPI journal article supplement (doi:10.3390/ijms232314679), 2022-11-24
Supplement: s1 [file s1]

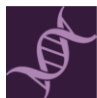

## Supplementary Material

**Supplementary Table S1.** qRT-PCR primer sequences in Korean pine

| Unigenes                              | Forward primer       | Reverse primer      |
|---------------------------------------|----------------------|---------------------|
| c154707.graph_c1 (Internal reference) | CAGCTCAGCTTGAAATGA   | ACGAGTACTGTGAGGAAA  |
| c180344.graph_c0                      | CGACATGGTTCCAAACTA   | GACCCTGAGAAAATTGTTG |
| c133544.graph_c0                      | AGGGGATGAATTCAGCATA  | CGCATTACATACTTTCGA  |
| c163132.graph_c0                      | GACACACAATCCCAATTG   | GGTAGTTTGTGTTTGCAG  |
| c187964.graph_c1                      | TGGAAACCCTGTTTGTGAA  | GCAATGGCTCGGTCATAT  |
| c188830.graph_c0                      | CTCCTAGCTCTCAGGTCAT  | CTTTGCGATGAGTTGTGC  |
| c181305.graph_c0                      | CTGGTTGGTTACACGTTCC  | TGTGCATGGATAGACCGAT |
| c187768.graph_c0                      | ATGGACATGAAGCATTGC   | CGGTGATTGGTTACAACC  |
| c183265.graph_c0                      | TTCTCAATCCGAATCTGGAA | AGGAGATGTCACCGTAGTA |
| c187512.graph_c0                      | TCTCCGATCTTCAGGAATCA | TGGCAACCATCAATCAAGT |
| c187027.graph_c1                      | TGATGAAGGCTTCCACAGA  | CAAGTGCTATGCGAACCC  |
| c187045.graph_c0                      | GCAAGAGCTACAGATCAA   | GGACGAAATCGTATTCAAC |

**Supplementary Table S2.** Different genes related to cytokinin between F and S cell lines of Korean pine

| Gene ID          | Gene family | Functional description                                  | Regulated |
|------------------|-------------|---------------------------------------------------------|-----------|
| c185059.graph_c0 | AHK2_3_4    | Arabidopsis histidine kinase 2/3/4 (cytokinin receptor) | down      |
| c189912.graph_c0 | ARR-B       | Two-component response regulator ARR-B family           | up        |

**Supplementary Table S3.** Functional description of qRT-PCR validated genes in Korean pine

| Gene ID          | Gene family | Functional description                  |
|------------------|-------------|-----------------------------------------|
| c133544.graph_c0 | GST         | Glutathione S-transferase               |
| c180344.graph_c0 | GST         | Glutathione S-transferase               |
| c181305.graph_c0 | GST         | Glutathione S-transferase               |
| c183265.graph_c0 | DHAR        | Glutathione dehydrogenase/transferase   |
| c187027.graph_c1 | GST         | Glutathione S-transferase               |
| c187045.graph_c0 | GST         | Glutathione S-transferase               |
| c187964.graph_c1 | GST         | Glutathione S-transferase               |
| c188830.graph_c0 | GST         | Glutathione S-transferase               |
| c190620.graph_c2 | ODC1        | Ornithine decarboxylase                 |
| c187768.graph_c0 | GULO        | L-Gulonolactone oxidase                 |
| c163132.graph_c0 | SAUR        | Auxin-responsive protein SAUR71-like    |
| c187512.graph_c0 | ARF         | Auxin response factor 2-like isoform X1 |

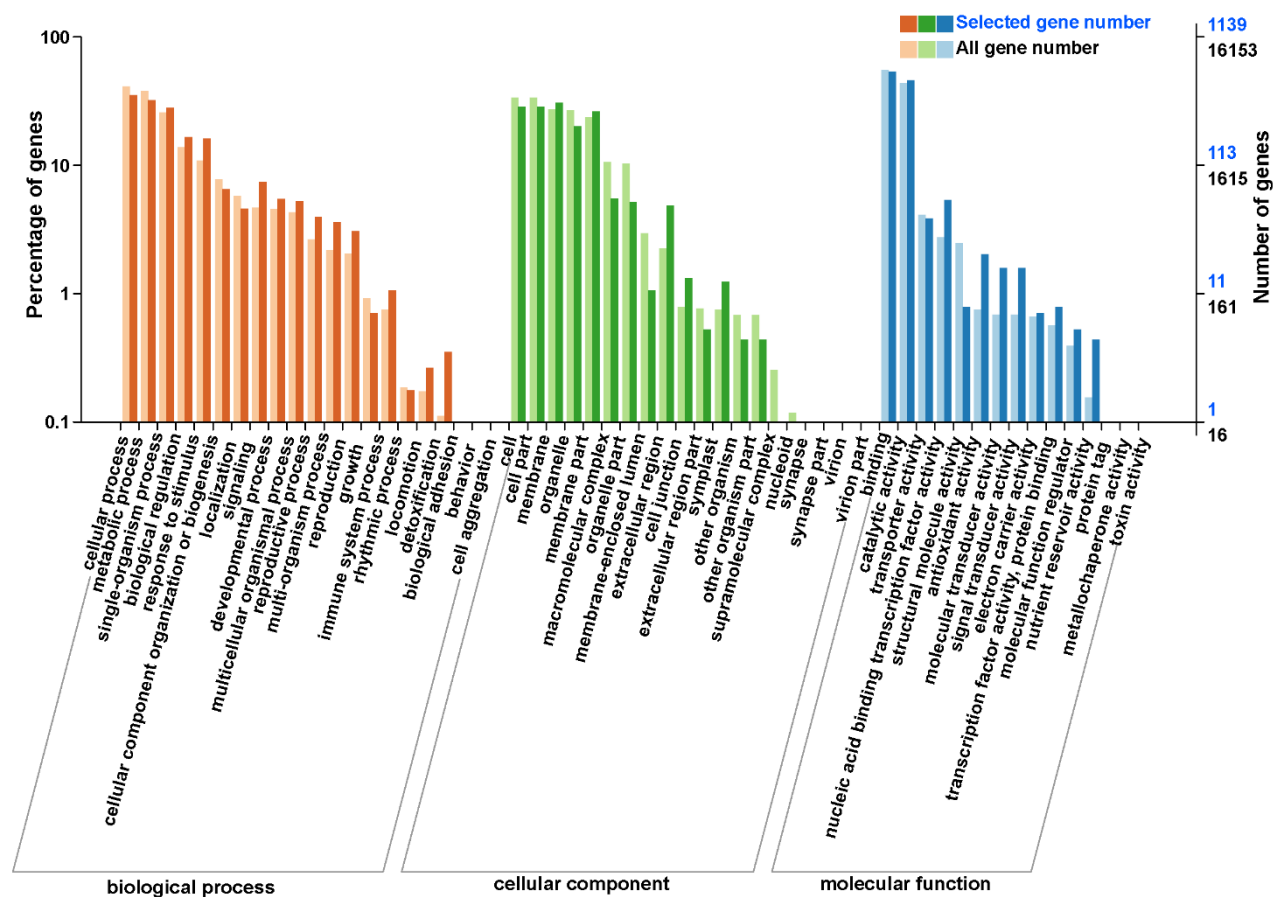

**Supplementary Figure S1.** Annotation statistics diagram of the GO secondary node of the differentially expressed genes of F and S cell lines of Korean pine.

## COG Function Classification of Consensus Sequence

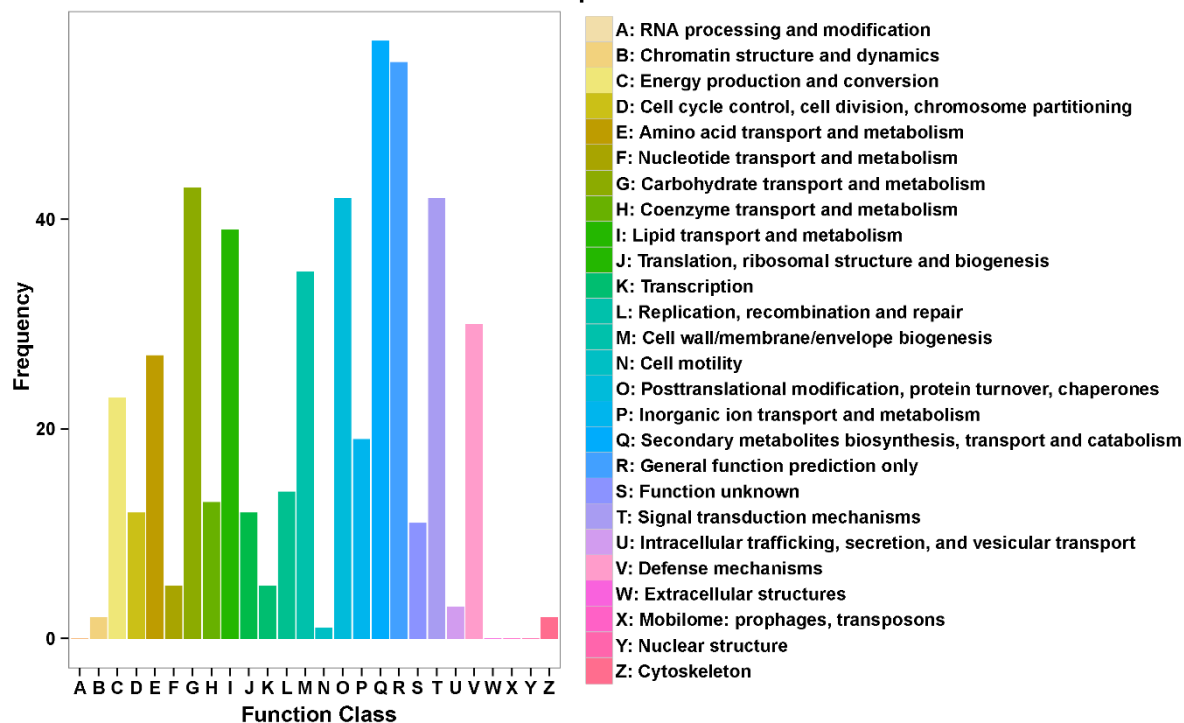

**Supplementary Figure S2.** Classification statistics of COG annotation of differentially expressed genes in F and S cell lines of Korean pine.

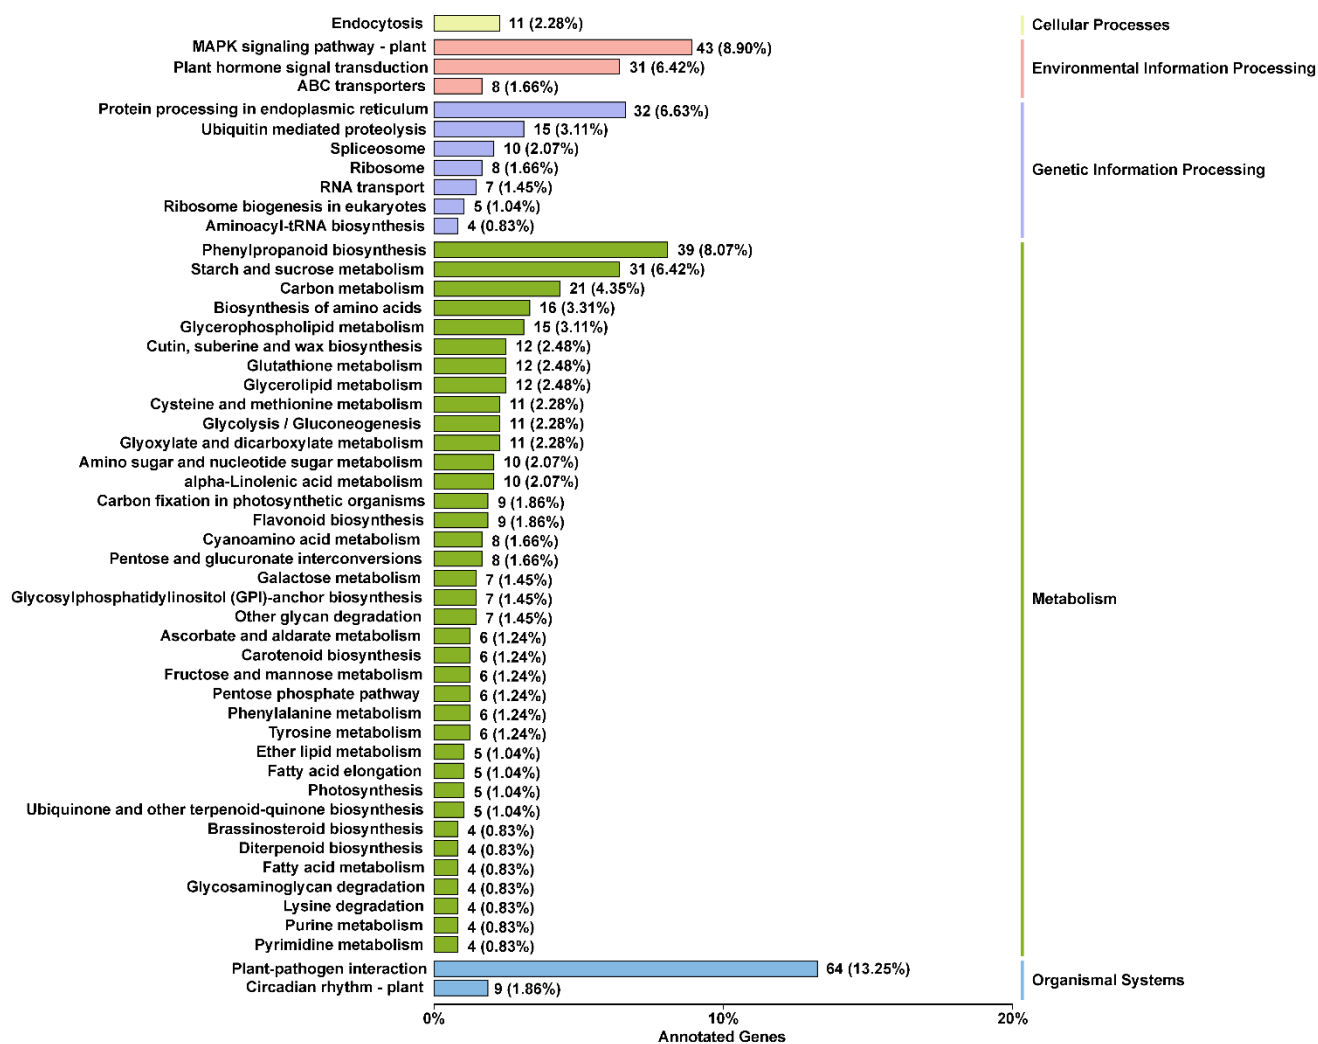

Supplementary Figure S3. KEGG Pathway classification of differentially expressed gene in two cell lines of Korean pine.
